# Supplementary material for: Modulatory Effects of Huoxiang Zhengqi Oral Liquid on Gut Microbiome Homeostasis Based on Healthy Adults and Antibiotic-Induced Gut Microbial Dysbiosis Mice Model
Source: Front Pharmacol. 2022 Mar 24;13:841990. doi: 10.3389/fphar.2022.841990 (PMC8987308; doi:10.3389/fphar.2022.841990)
Supplement: Supplementary file 4 [file Table1.xlsx]

## Sheet: Sheet1
Table S1. Questionnaire of the basic information and diet habits of the participants.*
AA（number）	N1(Name)		N2(Sex)	N3(Age)	N4(Nation)	N5(Place)	N6(Heghit:cm)	N7AAOE(Wight:kg)	N8(Profession)	N91(Hypertensionr;1)yes;2)no)	N92(Diabetes;1)yes;2)no)	N93(Cardiovascular and cerebrovascular diseases;1)yes;2)no)	N94(Gastrointestinal disease;1)yes;2)no)	N95(Chronic nephrosis;1)yes;2)no)	N96(Chronic liver disease;1)yes;2)no)	N97(Immunodeficiency diseases;1)yes;2)no)	N98(Autonomic immune diseases;1)yes;2)no)	N99(Mental disorder;1)yes;2)no)	N910(Cancer;1)yes;2)no)	N101OE(Antibiotics ;1)yes;2)no)	N102AE(Lactic acid bacteria ;1)yes;2)no)	N103AE(Microbial preparations ;1)yes;2)no)	N104AA(Nonsteroidal anti-inflammatory drugs ;1)yes;2)no)	N105OE(Hormone ;1)yes;2)no)	N106AE(other disease)	N11AE(Long-term medication history;1)yes;2)no)	N12OEAE(Invasive surgery;1)yes;2)no)	N13OE(Disease of digestive tract;1)yes;2)no)	N14(History of abdominal surgery;1)yes;2)no)	N15(History of drug and food allergy;1)yes;2)no)	N16(Smoking)	N17AE(Drinking)	N18(Breakfast)	N19AE(Diet)	N20AE(Tasting)	N21(Staple food)	N22AAAA(Food match)	N23(Drinking water)	N24(Fruit)	N25AAAAAE(Defecation)	N26AE(Sleeping)
1	Xiaoni Guo		Female	26	Han	Chongqing	161	50	9	2	2	2	2	2	2	2	2	2	2	2	2	2	2	2		2	2	2	2	2	3	3	1	2	4	1	2	2	1	2	1
2	Jun Diao		Male	23	Han	Chongqing	172	62	9	2	2	2	2	2	2	2	2	2	2	2	2	2	2	2		2	2	2	2	2	3	3	1	1	1	1	1	2	3	2	1
3	Lingping Yang		Female	24	Han	Chongqing	158	49	9	2	2	2	2	2	2	2	2	2	2	2	2	2	2	2		2	2	2	2	2	3	3	1	1	1	1	3	3	2	2	2
4	Ruoyu Li		Female	23	Han	Chongqing	157	46	9	2	2	2	2	2	2	2	2	2	2	2	2	2	2	2		2	2	2	2	2	3	3	1	1	4	1	3	1	2	2	2
5	Zhaoxia Yu		Female	24	Han	Chongqing	161	46.5	9	2	2	2	2	2	2	2	2	2	2	2	2	2	2	2		2	2	2	2	2	3	3	1	1	1	1	3	2	1	2	2
6	Miaomiao Xu		Female	25	Han	Chongqing	168	56	9	2	2	2	2	2	2	2	2	2	2	2	2	2	2	2		2	2	2	2	2	3	3	1	1	1	1	3	2	1	2	2
7	Xian Zhu		Female	26	Han	Chongqing	158	57	9	2	2	2	2	2	2	2	2	2	2	2	2	2	2	2		2	2	2	2	1	3	3	1	1	1	1	2	2	2	2	1
8	Tao Kuang		Female	30	Han	Chongqing	156	45	9	2	2	2	2	2	2	2	2	2	2	2	2	2	2	2		2	2	2	1(Cesarean)	2	3	3	3	1	4	1	2	1	3	2	2
9	Xiangjun Zhou		Female	23	Han	Chongqing	160	50	9	2	2	2	2	2	2	2	2	2	2	2	2	2	2	2		2	2	2	2	2	3	3	2	1	4	1	3	2	2	2	1
10	Shanshan Zhang		Female	26	Han	Chongqing	165	52	9	2	2	2	2	2	2	2	2	2	2	2	2	2	2	2		2	2	2	2	2	3	3	1	1	4	1	3	1	2	2	1
11	Zhuxiu Chen		Female	24	Han	Chongqing	158	55	9	2	2	2	2	2	2	2	2	2	2	2	2	2	2	2		2	2	2	2	2	3	3	2	1	4	1	3	2	2	2	1
12	Lulu Sheng		Female	24	Han	Chongqing	156	55	9	2	2	2	2	2	2	2	2	2	2	2	2	2	2	2		2	2	2	2	2	3	3	1	2	4	1	3	3	2	2	1
13	Junhao Su		Male	24	Han	Chongqing	175	66	9	2	2	2	2	2	2	2	2	2	2	2	2	2	2	2		2	2	2	2	2	3	3	1	1	1	1	3	3	2	2	2
14	Junting Xiao		Male	25	Han	Chongqing	170	68.5	9	2	2	2	2	2	2	2	2	2	2	2	2	2	2	2		2	2	2	2	2	3	3	3	1	4	4	1	3	4	2	2
15	Hongmei Zhou		Female	25	Han	Chongqing	155	47	9	2	2	2	2	2	2	2	2	2	2	2	2	2	2	2		2	2	2	2	2	3	3	3	1	4	4	3	2	2	3	1
16	Jun Wang		Female	24	Han	Chongqing	157	54.5	9	2	2	2	2	2	2	2	2	2	2	2	2	2	2	2		2	2	2	2	2	3	3	1	1	1	1	3	3	2	2	2
17	Hong Ling		Female	24	Han	Chongqing	158	45	9	2	2	2	2	2	2	2	2	2	2	2	2	2	2	2		2	2	2	2	2	3	3	4	1	4	1	1	1	3	3	1
18	Xinhao Duan		Male	24	Han	Chongqing	173	65	9	2	2	2	2	2	2	2	2	2	2	2	2	2	2	2		2	2	2	2	2	3	3	1	1	1	1	3	3	3	2	1
19	Yin Yang	History of allergic	Female	25	Han	Chongqing	156	49	9	2	2	2	2	2	2	2	2	2	2	2	2	2	2	2		2	2	2	2	1	3	3	1	1	4	2	3	2	1	2	1
20	Xianglu Wu		Female	24	Han	Chongqing	159	47.5	9	2	2	2	2	2	2	2	2	2	2	2	2	2	2	2		2	2	2	2	2	3	3	2	1	4	2	3	2	3	3	3
21	Jie Wang	Nonsteroidal drugs	Male	24	Han	Chongqing	178	64	9	2	2	2	2	2	2	2	2	2	2	2	2	2	1	2		2	2	2	2	2	3	3	2	1	4	1	3	1	3	2	1
22	Jia Liu		Male	25	Han	Chongqing	173	70	9	2	2	2	2	2	2	2	2	2	2	2	2	2	2	2		2	2	2	2	2	3	2	1	1	4	1	3	3	3	2	2
23	Mengxue Chen		Female	23	Han	Chongqing	162	50	9	2	2	2	2	2	2	2	2	2	2	2	2	2	2	2		2	2	2	2	2	3	3	1	1	1	1	3	2	2	3	1
24	Min Yue		Female	23	Han	Chongqing	157	45.6	9	2	2	2	2	2	2	2	2	2	2	2	2	2	2	2		2	2	2	2	2	3	2	2	1	4	1	2	2	3	3	1
25	Bin Yang		Male	26	Han	Henan	168	61.3	9	2	2	2	2	2	2	2	2	2	2	2	2	2	2	2		2	2	2	2	2	3	2	3	2	4	1	3	2	2	2	1
26	Qianyu Zhou		Male	25	Han	Henan	175	70	9	2	2	2	2	2	2	2	2	2	2	2	2	2	2	2		2	2	2	2	2	2	2	2	1	4	1	1	2	2	2	2
27	Yiming Zhang		Female	24	Han	Henan	162	49.5	9	2	2	2	2	2	2	2	2	2	2	2	2	2	2	2		2	2	2	2	2	3	3	1	1	2	1	3	3	3	2	2
28	Qinyu Liu		Male	19	Han	Chongqing	175	83	9	2	2	2	2	2	2	2	2	2	2	2	2	2	2	2		2	2	2	2	2	4	2	1	1	3	1	3	2	3	2	2
29	Jun Ran		Male	19	Han	Chongqing	170	58	9	2	2	2	2	2	2	2	2	2	2	2	2	2	2	2		2	2	2	2	2	3	3	1	1	1	1	3	1	3	2	2
30	Yipei Zhao		Male	20	Han	Chongqing	182	64	9	2	2	2	2	2	2	2	2	2	2	2	2	2	2	2		2	2	2	2	2	3	3	1	1	1	1	3	2	3	2	2
31	Tao zhang		Male	19	Han	Chongqing	172	60	9	2	2	2	2	2	2	2	2	2	2	2	2	2	2	2		2	2	2	2	2	3	3	3	1	4	1	3	2	3	2	1
32	Ke Zhang		Male	19	Han	Chongqing	175	72	9	2	2	2	2	2	2	2	2	2	2	2	2	2	2	2		2	2	2	2	1	3	2	3	1	3	1	3	2	3	2	1
33	Pengzhi Yuan		Male	19	Han	Chongqing	180	69.8	9	2	2	2	2	2	2	2	2	2	2	2	2	2	2	2		2	2	2	2	2	3	3	1	1	1	1	1	2	2	2	2
34	Peng Tang		Male	21	Han	Chongqing	179	85	9	2	2	2	2	2	2	2	2	2	2	2	2	2	2	2		2	2	2	2	1	3	3	2	2	1	1	3	1	2	3	1
35	Chiming Ma		Male	20	Tujia	Chongqing	169	62	9	2	2	2	2	2	2	2	2	2	2	2	2	2	2	2		2	2	2	2	2	3	3	3	1	5	1	3	2	3	2	2
36	Chunhe Zhu		Male	20	Han	Chongqing	172	64	9	2	2	2	2	2	2	2	2	2	2	2	2	2	2	2		2	2	2	2	2	3	3	2	1	1	2	3	1	2	3	2
37	Junhao Ren	antibiotic use/somking	Male	20	Han	Chongqing	178	79	9	2	2	2	2	2	2	2	2	2	2	1	2	2	2	2		2	2	2	2	2	1	2	2	1	4	2	3	2	2	2	2
38	Hongyuan Zhang		Male	19	Han	Chongqing	179	62	9	2	2	2	2	2	2	2	2	2	2	2	2	2	2	2		2	2	2	2	2	3	3	1	1	1	1	3	4	2	2	2
39	Xiaoyan Zhang		Male	21	Han	Chongqing	170	65	9	2	2	2	2	2	2	2	2	2	2	2	2	2	2	2		2	2	2	2	2	3	3	2	1	4	2	3	1	2	2	2
40	Shixin Tang		Male	22	Han	Chongqing	180	80	9	2	2	2	2	2	2	2	2	2	2	2	2	2	2	2		2	2	2	2	2	3	2	1	1	4	1	1	1	3	2	1
	represented abnormal trend of Shannon index;						represented gut microbiota with low Shannon index.
*Scoring Criteria:
Smoking and Drinking: 1, Every day; 2, Occasionally; 3, Already quitting; 4, Never.
Breakfast: 1, No breakfast; 2, Seldom; 3, Usually; 4, Every day.
Diet: 1, Irregularly; 2, Regularly.
Tasting: 1, greasy; 2, Spicy; 3, Sweet; 4, Salty; 5, Light.
Staple food: 1, Only rice and flour; 2, Preference for rice flour or coarse-grain potatoes; 3, Rice flour and coarse grains and potatoes in equal amounts.
Food match: 1, Other situations; 2, Half meat and half vegetarian,
Drinking water: 1, 400-600ml one day; 2, 600-800ml one day; 3, 800-1000ml one day; 4, Over 2000ml one day.
Fruit: 1, Never; 2, Seldom; 3, Usually; 4, Every day.
Defecation: 1, Once every three days or three times a day; 2, Once every two days or twice a day.
Sleeping: 1, Frequent late nights; 2, Occasional late nights; 3, No late nights.
